# Supplementary material for: Characterization of Two Fusarium solani Species Complex Isolates from the Ambrosia Beetle Xylosandrus morigerus
Source: MDPI journal article supplement (doi:10.3390/jof8030231), 2022-02-26
Supplement: s1 [file s1]

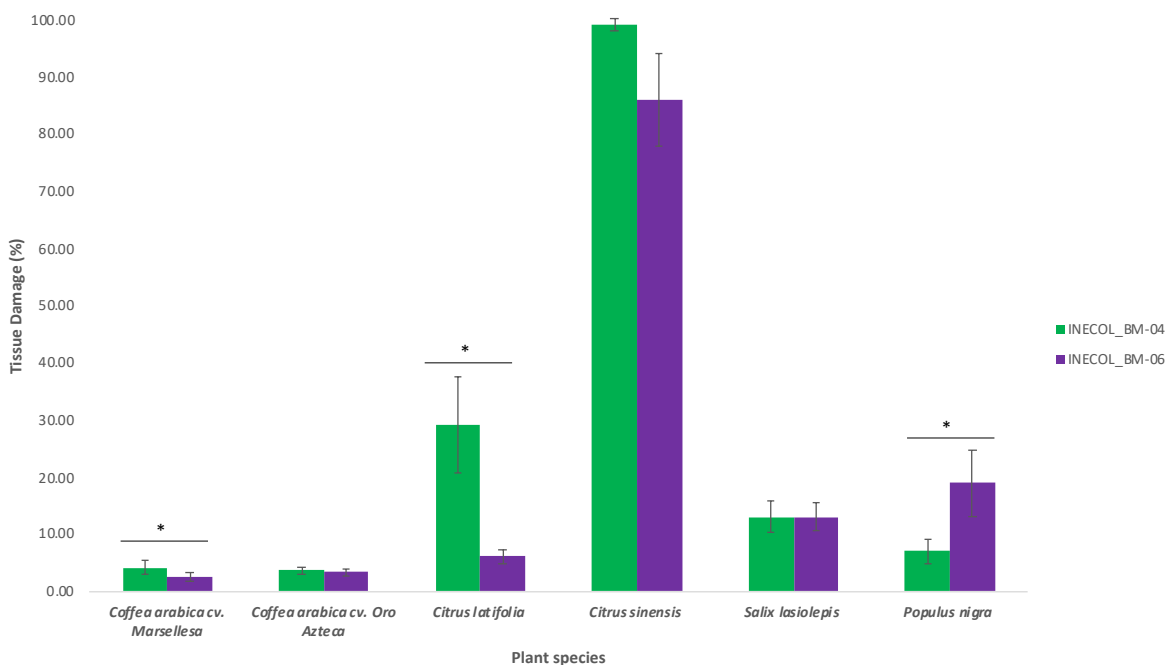

**Figure S1.** Percentage of tissue damage in leaves of *Coffea arabica*, *Citrus latifolia*, *Citrus sinensis*, *Salix lasiolepis* and *Populus nigra* inoculated with *Fusarium* sp. INECOL\_BM-04 and *Fusarium* sp. INECOL\_BM-06. The data are the average  $\pm$ SD (n=9 for *C. latifolia*, *C. sinensis*, *S. lasiolepis*, n=6 for *P. nigra* and *C. arabica*). (\*p-value<0.05 obtained by One-way Anova with post-hoc Tukey HSD test).
